# Supplementary material for: Ni(ii)-Based one dimensional coordination polymers for environmental remediation: design, topology, magnetism and the selective adsorption of cationic dyes
Source: Royal Society of Chemistry journal article supplement (doi:10.1039/d1ce00815c), 2021-01-01
Supplement: d1ce00815c1.pdf [file d1ce00815c1.pdf]

## Electronic supplementary information (ESI)

### **Ni(II) based one dimensional coordination polymers for environmental remediation: Design, topology, magnetism and selective adsorption of cationic dyes**

M. Shahwaz Ahmad<sup>a</sup>, Mohd Khalid<sup>a\*</sup>, M. Shahnawaz Khan<sup>a</sup>, M. Shahid<sup>a</sup>, Musheer Ahmad<sup>b</sup>

*<sup>a</sup>Functional Inorganic Materials lab (FIML), Department of Chemistry, Aligarh Muslim University, Aligarh 202002, India*

*<sup>b</sup>Department of Applied Chemistry, Aligarh Muslim University, Aligarh 202002, India*

*\*Corresponding author, Email: khalid215@gmail.com, Ph No. +91-9058639100*

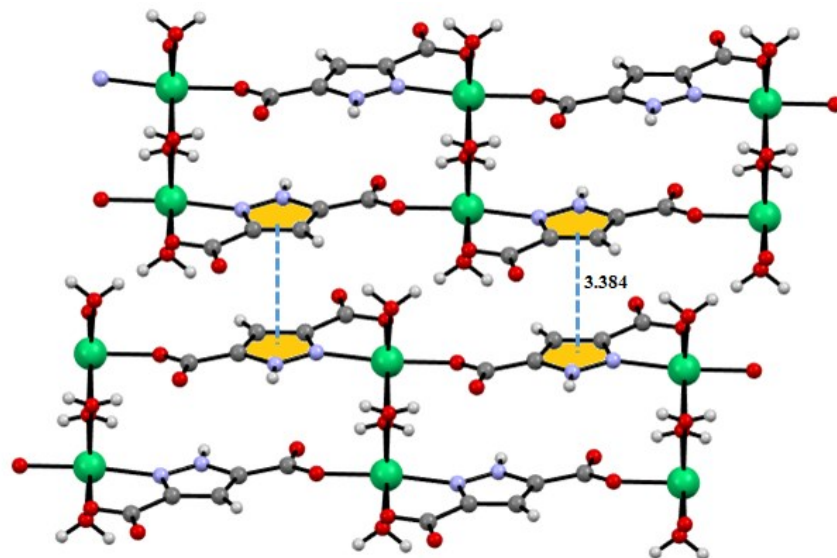

**Fig. S1.** Supramolecular non-covalent interactions between neighbouring moieties in CP-1.

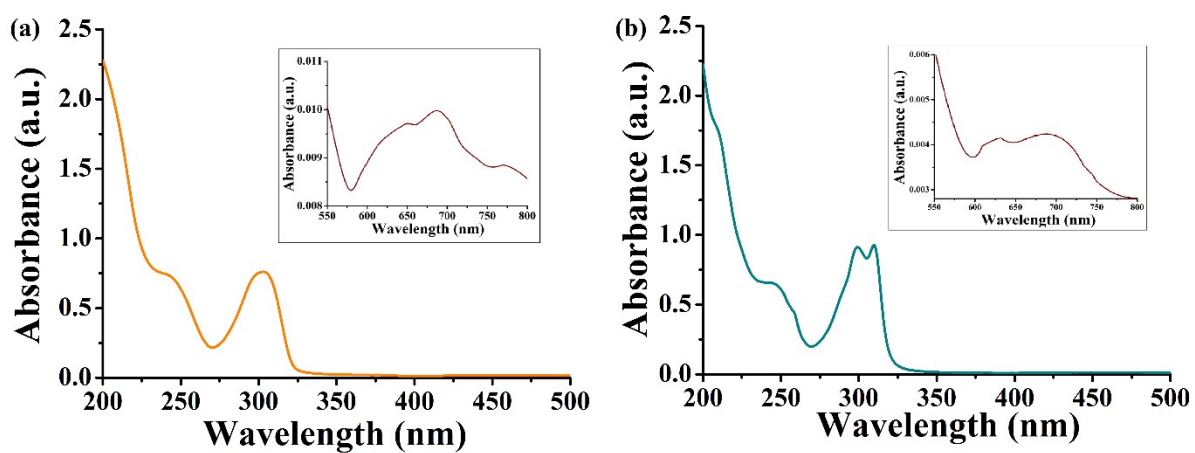

**Fig. S2.** UV-visible spectra of ( $10^{-3}$  M methanolic solution) CP-1 (a) and CP-2 (b).

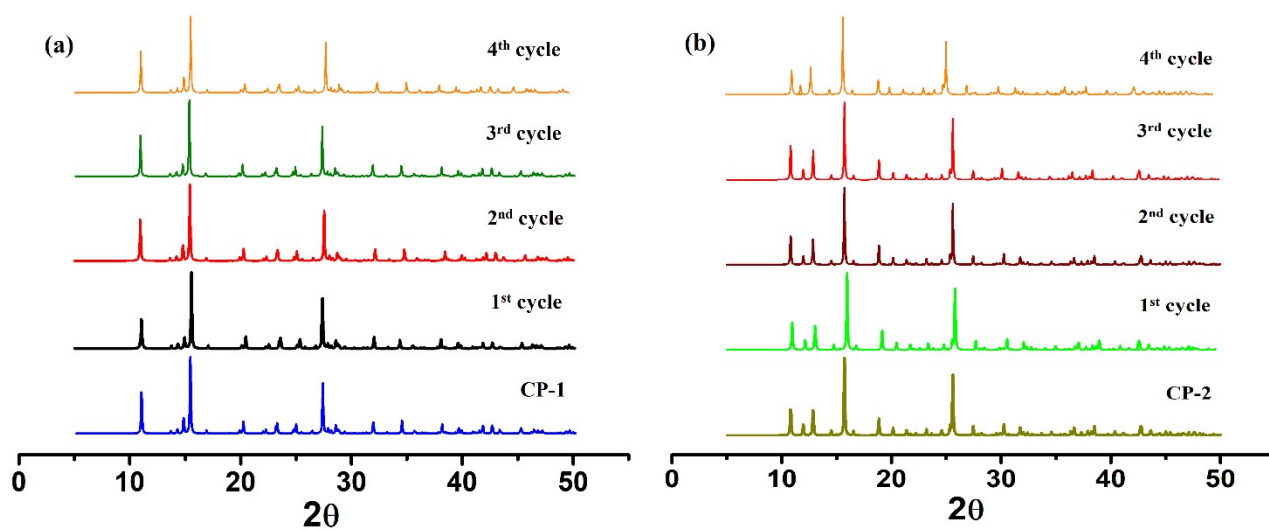

Fig. S3. PXRD patterns of CP-1 and CP-2 before and after adsorption of MB dye.

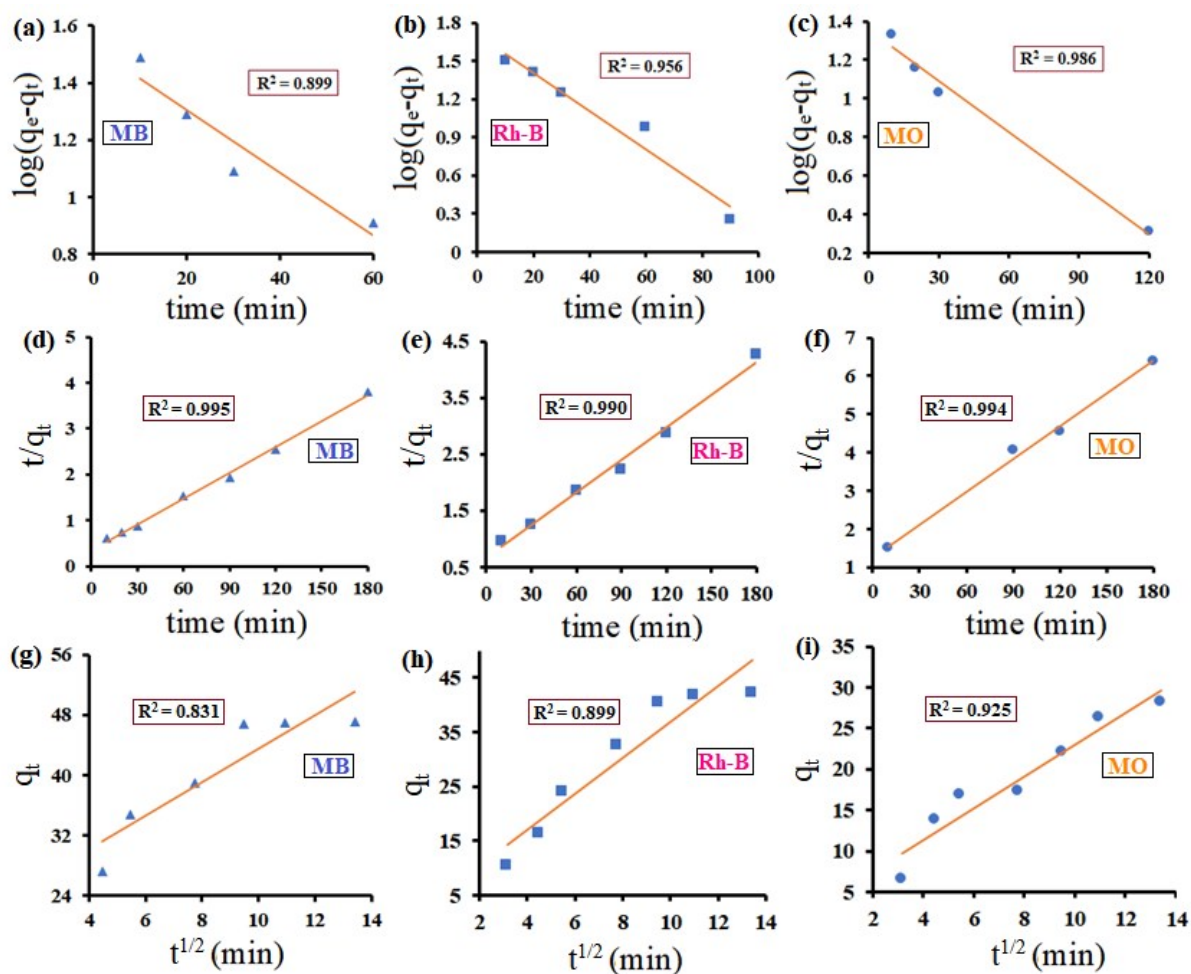

Fig. S4. Adsorption of MB, Rh-B and MO onto CP-1 using pseudo-first-order (a, b and c), pseudo-second-order (d, e and f) and intra-particle (g, h and i) kinetics models.

**Table S1.** Bond lengths for **CP-1** and **CP-2**.

| CP-1 |      |          | CP-2 |      |          |
|------|------|----------|------|------|----------|
| Atom | Atom | Length/Å | Atom | Atom | Length/Å |
| Ni1  | O1   | 1.991(3) | Ni1  | O3   | 2.025(3) |
| Ni1  | O4   | 2.034(2) | Ni1  | O2   | 2.024(4) |
| Ni1  | O5   | 2.072(2) | Ni1  | O5   | 2.058(3) |
| Ni1  | O5   | 2.144(3) | Ni1  | N4   | 2.109(4) |
| Ni1  | O6   | 2.037(3) | Ni1  | N1   | 2.087(4) |
| Ni1  | N9   | 2.053(3) | Ni1  | N3   | 2.083(4) |
| O1   | C1   | 1.260(5) | O5   | H5a  | 0.8500   |
| O2   | C1   | 1.260(4) | O3   | C6   | 1.313(6) |
| O3   | C5   | 1.242(4) | O4   | C6   | 1.200(6) |
| O4   | C5   | 1.276(5) | O1   | C1   | 1.203(7) |
| O6   | H6a  | 0.8500   | N4   | C9   | 1.343(7) |
| N8   | C2   | 1.361(5) | N1   | C2   | 1.337(7) |
| N9   | C4   | 1.342(5) | N3   | C7   | 1.326(6) |
| C1   | C2   | 1.478(5) | C2   | C1   | 1.535(7) |

**Table S2.** Bond angles for **CP-1** and **CP-2**.

| <b>CP-1</b> |      |      |            | <b>CP-2</b> |      |      |            |
|-------------|------|------|------------|-------------|------|------|------------|
| Atom        | Atom | Atom | Angle/°    | Atom        | Atom | Atom | Angle/°    |
| O4          | Ni1  | O1   | 89.29(10)  | O2          | Ni1  | O3   | 175.83(14) |
| O5          | Ni1  | O1   | 90.34(10)  | O5          | Ni1  | O3   | 89.49(15)  |
| O5          | Ni1  | O1   | 89.15(10)  | O5          | Ni1  | O2   | 87.96(14)  |
| O6          | Ni1  | O1   | 89.73(11)  | N4          | Ni1  | O3   | 93.45(15)  |
| O6          | Ni1  | O4   | 96.38(10)  | N4          | Ni1  | O2   | 89.12(15)  |
| O6          | Ni1  | O5   | 172.84(10) | N4          | Ni1  | O5   | 177.03(17) |
| N9          | Ni1  | O1   | 169.25(11) | N1          | Ni1  | O3   | 96.24(16)  |
| N9          | Ni1  | O5   | 100.21(11) | N1          | Ni1  | O2   | 80.42(15)  |
| C1          | O1   | Ni1  | 127.8(2)   | N1          | Ni1  | O5   | 88.81(15)  |
| C5          | O4   | Ni1  | 115.3(2)   | N3          | Ni1  | N4   | 89.41(15)  |
| C4          | N9   | Ni1  | 111.8(2)   | N3          | Ni1  | O3   | 80.83(15)  |
| N8          | N9   | Ni1  | 141.8(2)   | N3          | Ni1  | O2   | 102.49(15) |
